# Supplementary material for: Ex vivo processing for maturation of Arabidopsis KDEL-tailed cysteine endopeptidase 2 (AtCEP2) pro-enzyme and its storage in endoplasmic reticulum derived organelles
Source: PubMed Central journal article supplement (PMC3950626; doi:10.1007/s11103-013-0157-6), 2013-11-28
Supplement: 11103_2013_157_MOESM1_ESM.pdf [file 11103_2013_157_MOESM1_ESM.pdf]

**Figure S1: Cloning strategy in pGreen 0179 for expression of the fusion protein pre-pro-3xHA-mCherry-AtCEP2-KDEL under control of the endogenous AtCEP2 promoter.**

**DNA sequence:**

GGTACCagtagagtcacttccaagaaactagggaaacatcaaaccacgctcggttcattttggggatccttatgaaat  
acacaagccttatacaaaaaaaaaatattataaaaaaaaaatgaacgatatattaattcgtaattacataggccttaaaacc  
aagataagatcgggtacatggtgaaaatgaaaattattcaatctcctaataagaggtgagacaattatcaattcgaa  
actcatacatcaatcataaaagctacaatatttttctcaactccatcaattatccggtgggagtcatacaaaaaaaaa  
aattaaaaaaaaattattacatatatatgtatttttttttcagaaaagtgaatctctttcgaacatatgaaattat  
gaatattcatcaattggcctaggattacgagatcaacgtaaattatttaatacaaaaaataaaaaatagtgttc  
cttgcattaggaagcattatccaaccacgacgcccgggtattaagccaagatccattccaattattcattcat  
atctactacctaanaacgacattagctttttataaagaaagtcttaaccacgacggtgttcataatttaaatatt  
acatttggttgtaaacaccaatggtatgcctaacaacttaataaaaaccgccataattgttttttattgtgtttt  
tgaaaaactacttgcccgttggttatcttgtggcctgagtttttttctcttttgtttttaatatatgtagtatga  
aaccacgtttcaacaaatgggctgcgccaatggtcacgcatcttgcccttgagaattttgaaatacaactaatta  
gagattaaggtatggaaatgtacaaaaatcgccacgagatcccttcgtagatccacatgggtattaccgggataca  
tggagaaacatgttttcttaagatcagtacattactcattaatgggtcgatattagtaaattatttttgtacgta  
attgctcgggtgcatggtttaagacgtgtgttcttaaaagctactccaattaataatgatgctttcatgtgggtgtg  
gaattaaaagttttggatgctgtagtggtcaatcaaaaaatcataaagttcatagtttaagcttcgaaaaatgcaa  
tagcttggggatacaaaagctatctttacaaaaatcttagaaatgggtggagtcctacataatcacgtgtgtgatc  
caaattatagatgtaatagaagaaatttttcttgtattttcatgtattatatgcatcgctttatcgtctacaca  
tgaccaaaatttttccattttccatttttaactatacaaaaagaagtttttttattgtacaaggcattag  
gtcaacaatgccatggtgtggaacaacttgtctccacatttttggggacataatcctaattatcgttttca  
ttacttccctaagcaacaagttgcttcatcttaattttccatttttgggtataaaaactatccatcaaccctgacaa  
atttaaacgatgaaagcctgaattattgataatgatattgatattcatccaaacgatgaaagcctgaatt  
attcagttttaaaaggatattcagttttctctcactgtcagctaaacttagtcaaatcaaacattcataaataat  
attacacaacatatagatctataagcatgacatttataaaacatatattataaatcttatgatttattatccta  
aactatttagaaagaatgatggttctcttattctctcaaatgctgtcctagaagttccacaagtctaacca  
agacgtatacacaatgatacacaataataatcattttccaaacggttgatggtatttgagtaatttcaaatctct  
acagaaaaatatttctctttccctatatatatccgataccatctcattgcactttcaacctcaacaaataacca  
atcaaccaaaaaaaaaaaaaaaaa**ATGAAGAACTTCTTTTGATATTTCTCTTTTCTCTTGTCATTCTCAAACCTGC**  
**TTGTGGATTTCGATTACGACGACAAGGAAATAGAAAAGCGAAGAGGGCTTATCAACGCTTTATGATAGATGGAGGAG**  
**CCACCCTCCGTTTCTTAGGAGTCTAAATGAAAGGGGAGAAGAGATTCAACGTTTTTCAGACACAATGTCATGCATGT**  
**CCACAATACCAACAAGAAGAACCGATCCTACAAACTTAAGCTCAACAAGTTTGCAGATTTAACAATTAATGAGTT**  
**CAAGAATGCATACACCGGTTCCAACATCAAGCATCACAGAATGTTGCAAGGACCAAAAACGCGGCTCAAAAACAGTT**  
**CATGTATGATCATGAGAATTTATCCAAA**TTACCGTCCCTCGAGT**accacatacgcagcttccctgactatgctgact**  
**ctaccctatgacgtaccggattatgcatccctatatccgtagatggttccagattacgcttctcta**cgttcctc  
tagaggcgtccaccatgatGTCGAC**atggttgagcaagggcgaggaggataacatggccatcatcaaggagttcat**  
**gcgcttcaaggtgcacatggagggtccggtgaacggccacgagttcgagatcgaggcgaggcgaggcgccccc**  
**ctacgagggcaccagaccgccaagctgaaggtgaccaaggggtggccccctgccttcgctgggacatcctgtc**  
**ccctcagttcatgtaccgctcaaggcctacgtgaagcaccgccgacatccccgactacttgaagctgtcctt**  
**ccccgagggcttcaagttgggagcgcgtgatgaacttcgaggacggcggtggtgaccgtgaccaggactcctc**  
**cctgcaggacggcgagttcatctacaaggtgaagctgcgcggcaccaactccccctccgacggccccgtaatgca**  
**gaagaagaccatgggctgggaggcctcctccgagcggatgtaccccgaggacggcgccctgaagggcgagatcaa**  
**gcagaggctgaagctgaaggacggcgccactacgacgctgaggtcaagaccactacaaggccaagaagccggt**  
**gcagctgccccggcctacaacgtcaacatcaagttggacatcacctcccacaacgaggactacaccatcgtgga**  
**acagtacgaaacgcgcccaggggcccactccacggcgccatggacgagctgtacaad**GGATCC**TTACCGTCTC**  
**CGTTGATTGGAGAAAGAAAGGTGCTGTCACTGAAATCAAGAATCAAGGAAAATGTGGAAGTTGTTGGGCATTCTC**  
**TACCGTAGCAGCTGTTGAGGGAATCAACAAGATCAAGACTAACAACTGGTCTCACTGTCTGAACAAGAACTAGT**  
**GGATTGTGATACTAAGCAGAATGAAGGTTGTAACGGAGGTCTTATGGAGATTGCATTTGAATTCATCAAGAAGAA**  
**CGGTGGTATCACCCTGAAGATAGCTATCCTTATGAAGGTATCGATGGAAAATGCGACGCTTCAAAGGATAACGG**  
**CGTGCTTGTGACGATAGATGGGCATGAAGATGTACCCGAAAACGACGAAAATGCTCTTCTTAAGGCTGTTGCAAA**  
**CCAACCTGTATCTGTTGCAATTGATGCTGGAAGTTCAGATTTCCAGTTTTATTTCAGAGGGAGTGTTTACGGGATC**  
**TGTAAGTTCAGAGGGGAGGAGGCTATATAAAGATTGAAAGAGAGATTGATGAACCGGAAGG**  
**CGCTTCCGGTATTGCGATGGAGGCATCGTATCCGATCAAGCTATCGTCGTCTAATCCTACCCGAAAGACGGTGA**  
**TGTC**CAAAGATGAGCTCTAG**atattgtgtacacattgtgtgtaaaacatatcaaggtgatccaattccttg**  
**ttgattcatggtttagtttctccttcatgatttgattttggttggttttgaatttgaataaaaat**  
**gtctcgtgttttctc**GCGGCCG****

### Primers used for PCR amplification and cloning:

#### Primer pair 1 for amplification of the promoter and the pre-pro-sequence (2362 bp):

Sense: 5'-cattgGGTACCagtagagtcacttccaag-3'  
Tm ges.: 66°C Tm: 51°C

Antisense: 5'-gtaCTCGAGggacggttaatttgataaa-3'  
Tm ges.: 65°C Tm: 53°C

#### Primer pair 2 for amplification of the 3xHA tag (132 bp):

Sense: 5'-aaaCTCGAGtaccatacagacgttcctg-3'  
Tm ges.: 66°C Tm: 54°C

Antisense: 5'-catGTCGACcatatggtggacgcctct-3'  
Tm ges.: 65°C Tm: 52°C

#### Primer pair 3 for amplification of mCerry (714 bp):

Sense: 5'-atgGTCGACatggttgagcaagggcgag-3'  
Tm ges.: 65°C Tm: 52°C

Antisense: 5'-taaGGATCCcttgtacagctcgtccatg-3'  
Tm ges.: 66°C Tm: 54°C

#### Primer pair 4 for amplification of AtCEP2 (846 bp):

Sense: 5'-aagGGATCCttaccgtcctccggttgat-3'  
Tm ges.: 65°C Tm: 52°C

Antisense: 5'-gtgGCGGCCGCgagaaaacacgagacatt-3'  
Tm ges.: 68°C Tm: 51°C

### Protein sequence:

MKKLLLIFLFLSVILQACGF<sup>DYDDKEIESE</sup>EGLSTLYDRWRSHHSVPRSLNEREKRFNVFRHNMHVHNTNKKN  
RSYKLLKLNKFADLTINEFKNAYTGSNIKHHRLQGPKRGSKQFMYDHENLSK<sup>LPS</sup>LEYPYDVPDYASLYPYDVPD  
YASLYPYDVPDYASL<sup>RSSRGVHHMVD</sup>MLSKGEEDNMAI<sup>I</sup>KEFMRFKVHMEGSVNGHEFEIEGEGEGRPYEGTQTA  
KLKVTGGGLPFAWDILSPQFMYGSKAYVKHPADIPDYLKLSFPEGFKWERVMNFEDGGVVTVTQDSSLQDGEFI  
YKVKLRGTNFPDGPVMQKKTMGWEASSERMPEDGALKGEIKQRLKLDGGHYDAEVKTTYKAKKPVQLPGAYN  
VNIKLDITSHNEDYTI<sup>VEQYERA</sup>EGRHSTGGMDELYK<sup>GS</sup>LPSVVDWRKKGAVTEIKNQKCGSCWAFSTVAAVEG  
INKIKTNKLVSLSEQELVDCDTKQNEGCNGLMEIAFEFIKKNGGITTEDSYPYEGIDGKCDASKDNGVLVTIDG  
HEDVPENDENALLKAVANQPVSVAIDAGSSDFQFYSEGVTGSCGTELNHGVAAVGYGSERGKKYWIVRNSWGAE  
WEGGYIKIEREIDPEGRCGIAMEASYPIKLSSSNPTPKDGDV<sup>KDEL</sup>

Pre - Pro - 3xHA - mCherry - AtCEP2 - KDEL

Amino acids shaded in white were introduced due to cloning strategy

**Figure S2: Cloning strategy in pGreen 0179 for expression of the non-functional fusion protein pre-pro-3xHA-mCherry-KDEL under control of the endogenous AtCEP2 promoter.**

**DNA sequence:**

GGTACCagtagagtcacttccaagaaaactaggaacatcaaaccacgtcgttgcatTTTTGGGGatcttatgaaat  
acacaagcttatacaaaaaaaaaatattataaaaaaaaaatgaacgtatattaattcgttaattacataggcttaaaacc  
aagataagatcgggtacatggttgaaaatgaaaattattcaatctcctaataagaggtgagacaattatcaattcgaa  
actcatacatcaatcataaaaagctacaatattttctcaactccatcaattatccgtgggagtcatacaaaaaaaaa  
aattaaaaaaaaattattacatatatatgtattttttttcagaaaagtgaaatctctttcgaacatatgaaattat  
gaaatttcatcaattggcctaggattacagagatcaacgtaaaatttttaatacaaaaaataaaaaatagtttc  
cttgcattaggaagcatcattatccaaccacgacgcgggtattaagccaagatccattccaattattcattcat  
atctactacctaanaacgacattagctttttataaagaaagtcttaaccacgacgtggtggtcatattttaaatt  
acatttgttgttaaacaccaatggtatgcctaacaacttaataaaaccgccataattgttttttattgtgtttt  
tgaaaaactacttgccggtgttatcttggcctgagttttttctctttgttttaataatgtagtatga  
aaccagtttcaacaaatgggctgcgccaatggtcacgcatcttgcccttgagaattttgaataacaactaatta  
gagattaaggatggaatgtacaaaaatcgccacgagatcctttcgtagatccacatggtattaccgggataca  
tgagaaaacatgttttcttaagatcagtagactcattaaatggtcgtatattagtaaattattttgtacgta  
attgctcgggtgcatggtttaagacgtgtgttcttaaaagctactccaattaataatgatgctttcatgtggtgtg  
gaattaaaagttttggatgctgtagtggtcaatcaaaaaatcataaagttcatagtttaagcttcgaaaatgcaa  
tagcttggggatacaaaagctatctttcaaaaaatcttagaaatggtggagtcctacataatcacgtgtgtgatc  
caaattatagatgtaatagaagaaatTTTTCTgtattttcatgtattatgcatcgcctttatcgtctacaca  
tgaccaaaatTTTTTcccattttcccatttttaatacctatacaaaagaagtTTTTTTattgtacaaggcattag  
gtcaacaatgccatggtgtgaaacaactttgtctccacatTTTTGGGGacatatcttaattcaattatcgccttca  
ttacttccctaagcaacaagtgtgcttcatcttaattttcccattattgtataaaactatccatcaaccctgacaa  
atTTaaacgatgaaagcctgaattattgataatgatattgatattcattatcatccaacgatgaaagcctgaatt  
atccagttttaaaggatattcagttttctctcactgctcagctaaacttagtcaaatcaaacattcataaatat  
attacacaacatatagatctataagcatgacatttataaaaccatataattataaattcttagatttattattccta  
aactatttagaagaatgatgaggttcccttattctctcaaatgctgtgctcctagaagttccacaagtccaacca  
agacgtatacacaatgatacacaataataattcattttccaaacggttgatggtatttgagtaatttcaaatctct  
acagaaaaatatttctctttccctatatatatccgataccatctcattgcactttcaacctcaaaacaaataacca  
atcaaccaaaaaaaaaaaaaaaaa**ATGAAGAACTTCTTTTGATATTTCTCTTTCTCTTGTCAATTCTCCAAACTGC**  
**TTGTGGATTTCGATTACGACGACAAGGAAATAGAAAGCGAAGAGGGCTTATCAACGCTTTATGATAGATGGAGGAG**  
**CCACCCTCCGTTCCCTAGGAGTCTAAATGAAAGGGAGAAGAGATTCAACGTTTTTCAGACACAATGTCATGCATGT**  
**CCACAATACCAACAAGAAGAACCGATCCTACAAACTTAAGCTCAACAAGTTTGCAGATTTAACAATTAATGAGTT**  
**CAAGAATGCATACACCGGTTCCAACATCAAGCATCACAGAATGTTGCAAGGACCAAAACGCGGCTCAAAACAGTT**  
**CATGTATGATCATGAGAATTTATCCAAA**TTACCGTCC**CTCGAG**taccatacgcagcttccctgactatgctcact****  
**ctacccttatgacgtaccggattatgcatccctatatccgtatgatgttccagattacgcttctcta**cgttcctc****  
**tagaggcgtccaccatgat**GTCGAC**atggtgagcaagggcgaggaggataacatggccatcatcaaggagttcat**  
**gcgcttcaaggtgcacatggagggtccgtgaacggccacgagttccagatcgaggggcgaggggcgaggccgccc**  
**ctacgagggcaccagaccgccaagctgaaggtgaccaaggtggccccctgcccttcgctgggacatcctgtc**  
**ccctcagttcatgtacggctccaaggcctacgtgaagcaaccccgccgacatccccgactacttgaagctgtcctt**  
**ccccgagggcttcaagtgggagcgcgtgatgaacttcgaggacggcggcgtggtgaccgtgaccaggactcctc**  
**cctgcaggacggcgagttcatctacaaggtgaagctgcgcggcaaccaacttcccctccgacggccccgtaatga**  
**gaagaagaccatgggctgggaggcctcctccgagcggatgtaccccaggacggcgcctgaagggcgagatcaa**  
**gcagaggctgaagctgaaggacggcggcactacgacgctgaggtcaagaccctacaaggccaagaagcccgt**  
**gcagctgcccggcctacaacgtcaacatcaagttggacatcacctcccacaacgaggactacaccatcgtgga**  
**acagtacgaacggcggcggggccgcccactccaccggcggcatggacgagctgtacaad**GGATCCGGTGATGTCAA****  
**AGATGAGCTCTAG**atattgtgtacacattgtgtaaaaccatatacaaggtgatcccaattccttgttgat  
tcatgttgttagtttctccttcatgatttgattttgttggtttgaatttgaataaaaaatgtctc  
gtgttttctc**GCGGCCGC**

### Primers used for PCR amplification and cloning :

#### Primer pair 1 for amplification of the promoter and the pre-pro-sequence (2362 bp):

Sense: cattgGGTACCagtagagtcacttccaag  
Tm ges.: 66°C Tm: 51°C

Antisense: gtaCTCGAGgggacggtaatttggataaa  
Tm ges.: 65°C Tm: 53°C

#### Primer pair 2 for amplification of the 3xHA tag (132 bp):

Sense: aaaCTCGAGtaccatacagacgttctctg  
Tm ges.: 66°C Tm: 54°C

Antisense: catGTCGACcatatggtggacgcctct  
Tm ges.: 65°C Tm: 52°C

#### Primer pair 3 for amplification of mCerry (714 bp):

Sense: atgGTCGACatggttgagcaagggcgag  
Tm ges.: 65°C Tm: 52°C

Antisense: taaGGATCCcttgtacagctcgtccatg  
Tm ges.: 66°C Tm: 54°C

#### Primer pair 4 for amplification of the KDEL-3'UTR (178 bp):

Sense-kdel aagGGATCCGGTGATGTCAAAGATGAGC  
Tm ges.: 65°C Tm: 54°C

Antisense: gtgGCGGCCGcagaaaacacgagacatt  
Tm ges.: 68°C Tm: 51°C

### Protein sequence:

MKKLLLIFLFLVILQTACGFDYDDKEIESEEGSLTLYDRWRSHHSVPRSLNEREKRFNVFRHNVMHVHNTNKKN  
RSYKLLKLNKFADLTINEFKNAYTGSNIKHHRLQGPKRGSKQFMYDHENLSKLPSELYPYDVPDYASLYPYDVPD  
YASLYPYDVPDYASLRSSRGVHHMVDMLSKGEEDNMAIIEKFMRFKVHMEGVSVNGHEFEIEGEGEGRPYEGTQTA  
KLKVTGGGLPFAWDILSPQFMYGSKAYVKHPADIPDYKLSFPEGFKWERVMNFEEDGGVVTVTQDSSLQDGEFI  
YKVKLRGTNFPDGPVMQKKTMGWEASSERMPEDGALKGEIKQRLKLDGGHYDAEVKTTYKAKKPVQLPGAYN  
VNIKLDITSHNEDYTIQEYERAEGRHSTGGMDELYKSGSDVKDEL

Pre - Pro - 3xHA - mCherry - KDEL

Amino acids shaded in white were introduced due to cloning strategy



**Figure S4: Antibodies directed against the mature subunit of AtCEP1 cross-react with AtCEP2**

**A: Cloning strategy.** M, L and E (shaded in green) and the His-tag (yellow) were added by cloning.

**AtCEP1 (636bp)**

```
GGAGCCGTCACCTCCTGTCAA AAAACCAAGGCCAATGCGGGAGTTGTTGGGCGTTTTTCAACAGTTGTTGCGGTGGAA
GGGATCAACCAAATAAGA AACTAAAAAGCTGACATCACTCTCAGAGCAAGAGCTAGTAGATTGTGATACAAACCAG
AACCAAGGATGCAATGGAGGTCTAATGGACCTTGCTTTTGAGTTCATCAAGGAGAAAAGGAGGACTCACAAAGTGAG
CTAGTGTACCCTTACAAGGCTTCTGATGAAACTTGTGACACAAAACAAAAGAAAATGCTCCGGTAGTTTCAATCGAT
GGACACGAAGATGTTTCTAAGA ACAGCGAGGATGATCTAATGAAAGCTGTTGCTAATCAGCCTGTTTCTGTTGCT
ATTGATGCTGGAGGCTCAGACTTTCAATTCTACTCCGAGGGAGTGTTTACCGGGAGATGCGGAACAGAGCTAAAC
CATGGAGTTGCGGTAGTAGGGTATGGAACAACGATAGACGGAACAAAGTATTGGATTGTTAAGAATTCATGGGGA
GAGGAATGGGGAGAGAAAAGGATACATAAGAATGCAGAGAGGGATTTCGTCATAAAGAAGGACTTTGTGGTATTGCA
ATGGAAGCTTCTTATCCTCTCAAGAACTCCAACACT
```

CEP1 sense 5' -agaCATATGGGAGCCGTCACCTCCTGTCAA-3'`  
 CEP1 anti-sense 5' -agaCTCGAGAGTGTGGAGTTCTTGAGAGG-3'

**Protein:**

**M**GAVTPVKNQGCWSCWAFSTVVAVEGINQIRTKKLSLSEQELVDCDTNQNQGCNGLMDLAFEFIKKGLTSELVYPYKA  
 SDETCDTNKENAPVVSIDGHEDVPKNSDDLKAVANQPVSVAIDAGGSDFFQFYSEGVTGRCGTELNHGVAVVGYGTTIDG  
 TKYWIVKNSWGEEWGEKGYIRMQRGIRHKEGLCGIAMEASYPLKNSNT**LE**HHHHHHH\*

**AtCEP2 (630bp)**

```
GGTGCTGTCACTGAAATCAAGAATCAAGGAAAATGTGGAAGTTGTTGGGCATTCTCTACCGTAGCAGCTGTTGAG
GGAATCAACAAGATCAAGACTAACA AACTGGTCTCACTGTCTGAACAAGA AACTAGTGGATTGTGATACTAAGCAG
AATGAAGGTTGTAACGGAGGTCTTATGGAGATTGCATTTGAATTCATCAAGAAGAACGGTGGTATCACCCTGAA
GATAGCTATCCTTATGAAGGTATCGATGGAAAATGCGACGCTTCAAAGGATAACGGCGTGCTTGTGACGATAGAT
GGGCATGAAGATGTACCCGAAAACGACGAAAATGCTCTTCTTAAGGCTGTTGCAAACCAACCTGTATCTGTTGCA
ATTGATGCTGGAAGTTCAGATTTCCAGTTTTTATTTCAGAGGGAGTGTTTACCGGATCTTGTGGAACAGAGCTGAAC
CATGGTGTGGCAGCGGTTCGGGTATGGATCTGAGAGGGGGAAAAAGTATTGGATAGTGAGAAA AACTCATGGGGAGCT
GAATGGGGAGAGGGAGGCTATATAAAGATTGAAAGAGAGATTGATGAACCGGAAGGGCGTTGCGGTATTGCGATG
GAGGCATCGTATCCGATCAAGCTATCGTTCG
```

CEP2 sense 5' -agaCATATGGGTGCTGTCACTGAAATCAAGA-3'`  
 CEP2 anti-sense 5' -agaCTCGAGCGACGATAGCTTGATCGGAT-3'

**Protein:**

**M**GAVTEIKNQKCGWSCWAFSTVAAVEGINIKIKTNKLVSLSEQELVDCDTKQNEGCNGLMEIAFEF IKKNGGIT  
 EDSYPYEGIDGKCDASKDNGVLVTIDGHEDVPENDENALLKAVANQPVSVAIDAGSSDFQFYSEGVTGSCGTEL  
 NHGVAAVGYGSEKGYIWRNSWGAEWGEGGYIKIEREIDEPEGRCGIAMEASYPIKLSS**LE**HHHHHHH\*

**B: Westernblot analysis**

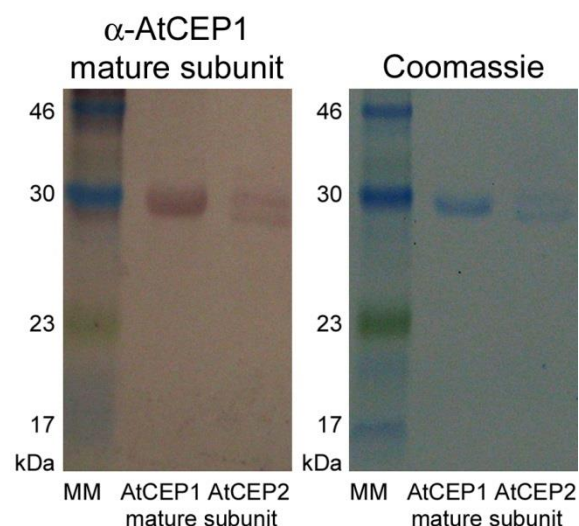

**Figure S5: AtCEP2 accepts proline near the cleavage site thus exhibiting the broad substrate specificity typical for KDEL-CysEPs.**

**Amino acids of the entire beta-casein sequence (224 aa) including the pre-sequence (amino acid residues 1-15) and the mature beta-casein (amino acid residues 16-224) with the cleavage sites indicated by arrows; proline residues are shown in red.**

MKVLILACLVALALA-  
 REL↓E↓ELN↓VPGEIVESLSSEESITRINKK↓IE↓KFQ↓S↓EEQQQTEDELQ↓DKIH↓PFA↓Q↓TQS↓LV↓YP↓F  
 PGP↓IP↓N↓S↓L↓PQ↓NIPPLT↓Q↓TPVV↓V↓PPFL↓QPEVM↓G↓VS↓KVK↓E↓A↓MAPKH↓K↓E↓MPFPK↓YPVE  
 PFT↓ES↓QS↓LT↓LT↓DVENLH↓LPLPL↓Q↓SWM↓H↓QPH↓QPLPPTVM↓FPPQSVLS↓LS↓Q↓SKV↓LPVPQ↓  
 K↓A↓VPYQ↓R↓D↓MPIQ↓AF↓L↓L↓Y↓Q↓EPVL↓GPVR↓GFPPIIV

**Cleavage sites in beta-casein ↓ identified by amino acid sequencing alone or in combination with MALDI-TOF and summary of amino acids found in positions P2, P1, P1' and P2'**

| MKVLILACLVALALA        |  | KHKE↓MPFP    |  | P2      | P1      | P1'    | P2'     |
|------------------------|--|--------------|--|---------|---------|--------|---------|
| -REL↓EELN              |  | PFPK↓YPVE    |  | L (14x) | Q (11x) | Q (9x) | P (20x) |
| RELE↓ELNVP             |  | EPFT↓ESQS    |  | V (8x)  | S (8x)  | L (9x) | S (7x)  |
| EELN↓VPGEIVESLSSEESITR |  | FTES↓QSLT    |  | K (6x)  | L (7x)  | E (7x) | E (6x)  |
| INKK↓IEKF              |  | ESQS↓LTLT    |  | P (6x)  | K (5x)  | K (4x) | V (5x)  |
| KKIE↓KFQS              |  | QSLT↓LTDV    |  | Q (5x)  | H (4x)  | V (4x) | Q (4x)  |
| EKFQ↓SEEQ              |  | LTLT↓DVEN    |  | F (5x)  | E (4x)  | S (4x) | T (4x)  |
| KFQS↓EEQQQTE           |  | ENLH↓LPLP    |  | I (3x)  | T (4x)  | M (3x) | L (4x)  |
| DELQ↓DKIH              |  | LPLL↓QSWM    |  | E (3x)  | V (4x)  | A (3x) | M (3x)  |
| HPFA↓QTQS              |  | PLLQ↓SWMH    |  | M (2x)  | A (3x)  | G (3x) | A (3x)  |
| PFAQ↓TQSL              |  | QSWM↓HQPH    |  | Y (2x)  | M (3x)  | Y (3x) | F (2x)  |
| QTQS↓LVYP              |  | SWMH↓QPHQ    |  | S (2x)  | P (2x)  | D (3x) | Y       |
| QSLV↓YFPF              |  | HQPH↓QPLP    |  | A (2x)  | N (2x)  | P (2x) | K       |
| LVYP↓FPGP              |  | PTVM↓FPPQ    |  | W       | R (2x)  | F (2x) | D       |
| GPPI↓NSLPQ             |  | SVLS↓LSQS    |  | H       |         | T (2x) | I       |
| PIPN↓SLPQ              |  | LSLS↓QSKV    |  | R       | F       | N (2x) | W       |
| IPNS↓LPQN              |  | SLSQ↓SKVL    |  | T       | Y       | I      |         |
| PNSL↓PQNI              |  | QSKV↓LPVP    |  | N       | G       | R      |         |
| SLPQ↓NIPP              |  | PVPQ↓KAVP    |  |         |         | H      |         |
| PPLT↓QTPV              |  | VPQK↓AVPY    |  |         |         |        |         |
| PLTQ↓TPVV              |  | PQKA↓VPYP    |  |         |         |        |         |
| TPVV↓VPPF              |  | PYPQ↓RDMP    |  |         |         |        |         |
| PVVV↓PPFL              |  | YPQR↓DMPI    |  |         |         |        |         |
| PPFL↓QPEV              |  | PQRD↓MPIQ    |  |         |         |        |         |
| PEVM↓GVSK              |  | MPIQ↓AFLL    |  |         |         |        |         |
| EVMG↓VSKV              |  | IQAF↓LLYQ    |  |         |         |        |         |
| MGVS↓KVKE              |  | QAFL↓LYQE    |  |         |         |        |         |
| SKVK↓EAMA              |  | AFLL↓YQEP    |  |         |         |        |         |
| KVKE↓AMAP              |  | FLLY↓QEPV    |  |         |         |        |         |
| VKEA↓MAPK              |  | LLYQ↓EPVL    |  |         |         |        |         |
| APKH↓KEMP              |  | EPVL↓GPVR    |  |         |         |        |         |
| PKHK↓EMPF              |  | GPVR↓GFPPIIV |  |         |         |        |         |

Residues in black correspond to the primary sequence, and those shown in red are replicates to illustrate the cleavage site from P4 to P4'.

| distribution     | P2   | P1   | P1'  | P2'  |
|------------------|------|------|------|------|
| nonpolar         | 65 % | 32 % | 38 % | 62 % |
| basic            | 13 % | 17 % | 10 % | 2 %  |
| acidic           | 5 %  | 8 %  | 16 % | 11 % |
| polar, uncharged | 17 % | 43 % | 36 % | 25 % |



**Figure S6: Expression of *AtCEP1* (At5g50260), *AtCEP2* (At3g48340) and *AtCEP3* (At3g48350) as visualized by the “root expression map visualizer [www.arexdb.org/]” shown in red (middle and right) and the *Arabidopsis* root template (left). The www.arexdb.org database attributes the observed expression for the KDEL peptidase(s) to *AtCEP1* (middle) and *AtCEP3* (right). No data set is available for *AtCEP2* in the ATH1 database. Comparison with our results from *P<sub>CEP1</sub>::GUS*, *P<sub>CEP2</sub>::GUS* and *P<sub>CEP3</sub>::GUS* plants (Helm et al., 2008) and *P<sub>CEP2</sub>::pre-pro-3xHA-mCherry-AtCEP2-KDEL*, however, suggests that the *AtCEP2* expression pattern has erroneously been attributed to *AtCEP1* (At5g50260, probe ID 248545\_at) or *AtCEP3* (At3g48350; probe ID\_252368\_at).**

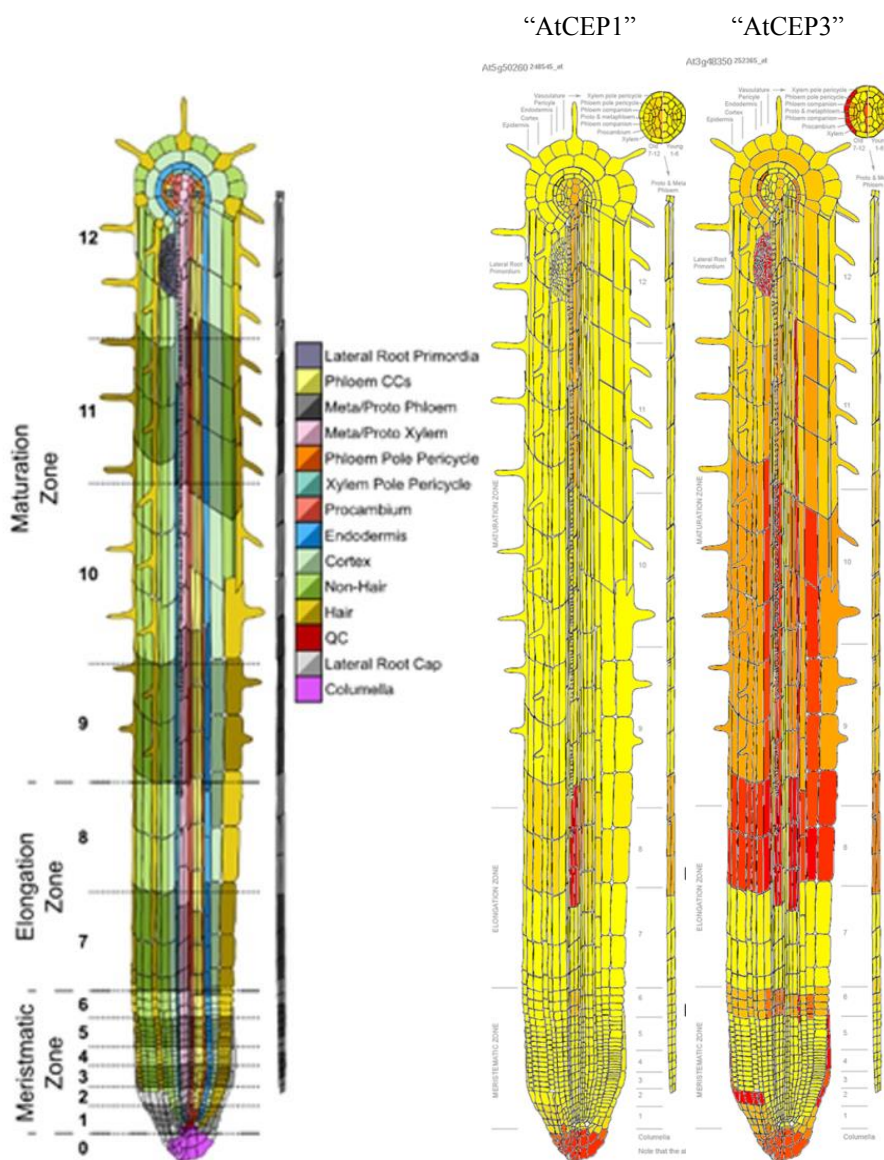



**Figure S7: *AtCEP1* and *AtCEP3* transcripts are slightly up-regulated in *cep2*.** Relative gene expression of *AtCEP1*, *AtCEP2* and *AtCEP3* in wild-type (WT) and *cep2* seedlings. Total RNA was extracted from 7-day-old seedlings. Expression levels were normalized to the reference gene *ACT8* and the expression in wild type was set to 1 in each experiment. Error bars: SEM.

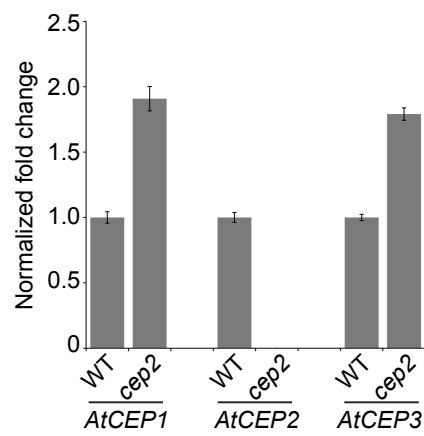

**Table S1:** Beta-casein peptides obtained by cleavage with AtCEP2

| aa-position in beta-casein | Peptide sequence                       |
|----------------------------|----------------------------------------|
| 16 - 22 N-term             | - .RELEELN  V                          |
| 50 - 68                    | Q  SEEQQOTEDELQDKIHPFA  Q              |
| 51 - 68                    | S  EEQQQOTEDELQDKIHPFA  Q              |
| 62 - 68                    | Q  DKIHPFA  Q                          |
| 62 - 69                    | Q  DKIHPFAQ  T                         |
| 73 - 82                    | S  LVYFPFGPIIP  N                      |
| 73 - 87                    | S  LVYFPFGPIHNSLPQ  N                  |
| 73 - 93                    | S  LVYFPFGPIHNSLPQNIPPLT  Q            |
| 75 - 82                    | V  YFPFGPIIP  N                        |
| 75 - 83                    | V  YFPFGPIPN  S                        |
| 75 - 84                    | V  YFPFGPIPN  S                        |
| 75 - 84                    | V  YFPFGPIPN  S                        |
| 75 - 87                    | V  YFPFGPIPN  S                        |
| 75 - 87                    | V  YFPFGPIPN  S                        |
| 75 - 93                    | V  YFPFGPIPN  S                        |
| 75 - 93                    | V  YFPFGPIPN  S                        |
| 75 - 93                    | V  YFPFGPIPN  S                        |
| 77 - 87                    | P  FPGPIPN  S                          |
| 77 - 87                    | P  FPGPIPN  S                          |
| 94 - 108                   | T  QTPVVVPPFLQPEVM  G                  |
| 94 - 103                   | T  QTPVVVPPFL  Q                       |
| 94 - 111                   | T  QTPVVVPPFLQPEVMGVS  K               |
| 95 - 103                   | Q  TPVVVPPFL  Q                        |
| 100 - 108                  | V  PPFLQPEVM  G                        |
| 100 - 109                  | V  PPFLQPEVM  G                        |
| 100 - 109                  | V  PPFLQPEVM  G                        |
| 100 - 111                  | V  PPFLQPEVMGVS  K                     |
| 100 - 111                  | V  PPFLQPEVMGVS  K                     |
| 110 - 135                  | G  VSKVKEAMAPKHKEMPFPKYPVEPFT  E       |
| 110 - 141                  | G  VSKVKEAMAPKHKEMPFPKYPVEPFTESQSLT  L |
| 112 - 128                  | S  KVKEAMAPKHKEMPFPK  Y                |
| 112 - 135                  | S  KVKEAMAPKHKEMPFPKYPVEPFT  E         |
| 112 - 137                  | S  KVKEAMAPKHKEMPFPKYPVEPFTES  Q       |
| 112 - 141                  | S  .KVKEAMAPKHKEMPFPKYPVEPFTESQSLT  L  |
| 115 - 135                  | K  EAMAPKHKEMPFPKYPVEPFT  E            |
| 115 - 141                  | K  EAMAPKHKEMPFPKYPVEPFTESQSLT  L      |
| 116 - 135                  | E  AMAPKHKEMPFPKYPVEPFT  E             |
| 116 - 141                  | E  AMAPKHKEMPFPKYPVEPFTESQSLT  L       |
| 117 - 135                  | A  MAPKHKEMPFPKYPVEPFT  E              |
| 122 - 128                  | H  KEMPFPK  Y                          |
| 122 - 135                  | H  KEMPFPKYPVEPFT  E                   |
| 122 - 141                  | H  KEMPFPKYPVEPFTESQSLT  L             |
| 123 - 135                  | K  EMPFPKYPVEPFT  E                    |
| 123 - 137                  | K  EMPFPKYPVEPFTES  Q                  |
| 123 - 141                  | K  EMPFPKYPVEPFTESQSLT  L              |
| 124 - 135                  | E  MPFPKYPVEPFT  E                     |
| 129 - 135                  | K  YPVEPFT  E                          |
| 140 - 156                  | S  LTLTDVENLHLPLPLLQ  S                |
| 144 - 149                  | T  DVENLH  L                           |
| 144 - 155                  | T  DVENLHLPLPLL  Q                     |
| 144 - 166                  | T  DVENLHLPLPLLQ  S                    |
| 150 - 156                  | H  LPLPLLQ  S                          |
| 160 - 171                  | M  HQPHQPLPPTVM  F                     |
| 160 - 179                  | M  HQPHQPLPPTVMFPPQSVLS  L             |
| 161 - 171                  | H  QPHQPLPPTVM  F                      |
| 161 - 179                  | H  QPHQPLPPTVMFPPQSVLS  L              |
| 164 - 171                  | H  QPLPPTVM  F                         |
| 182 - 191                  | S  QSKVLPVPQK  A                       |
| 182 - 192                  | S  QSKVLPVPQKA  V                      |
| 182 - 198                  | S  QSKVLPVPQKAVPYPQR  D                |
| 182 - 203                  | S  QSKVLPVPQKAVPYPQRDMPIQ  A           |
| 182 - 205                  | S  QSKVLPVPQKAVPYPQRDMPIQAF  L         |
| 182 - 206                  | S  QSKVLPVPQKAVPYPQRDMPIQAFLL  L       |
| 182 - 207                  | S  QSKVLPVPQKAVPYPQRDMPIQAFLL  Y       |

|                  |   |                                   |   |
|------------------|---|-----------------------------------|---|
| 183 - 191        | Q | SKVLPVPQK                         | A |
| 186 - 203        | V | LPVPQKAVPYPQRDMPIQ                | A |
| 191 - 198        | Q | KAVPYPQR                          | D |
| 191 - 203        | Q | KAVPYPQRDMPIQ                     | A |
| 192 - 198        | K | AVPYPQR                           | D |
| 192 - 199        | K | AVPYPQRD                          | M |
| 192 - 203        | K | AVPYPQRDMPIQ                      | A |
| 192 - 205        | K | AVPYPQRDMPIQAF                    | L |
| 192 - 206        | K | AVPYPQRDMPIQAF                    | L |
| 192 - 224 C-term | K | AVPYPQRDMPIQAFLLYQEPVLPVLRGPFPIIV | . |
| 193 - 198        | A | VPYPQR                            | D |
| 193 - 199        | A | VPYPQRD                           | M |
| 193 - 203        | A | VPYPQRDMPIQ                       | A |
| 198 - 203        | Q | RDMPIQ                            | A |
| 200 - 224 C-term | D | MPIQAFLLYQEPVLPVLRGPFPIIV         | . |
| 204 - 224 C-term | Q | AFLLYQEPVLPVLRGPFPIIV             | . |
| 207 - 224 C-term | L | LYQEPVLPVLRGPFPIIV                | . |
| 208 - 217        | L | YQEPVLPVLR                        | G |
| 208 - 224 C-term | L | YQEPVLPVLRGPFPIIV                 | . |
| 209 - 217        | Y | QEPVLPVLR                         | G |
| 210 - 217        | Q | EPVLPVLR                          | G |
| 214 - 224 C-term | L | GPVLRGPFPIIV                      | . |
| 218 - 224 C-term | R | GPFPIIV                           | . |
